# Supplementary material for: Depressed Colorectal Cancer: A New Paradigm in Early Colorectal Cancer
Source: PubMed Central journal article supplement — Clin Transl Gastroenterol. 2020 Dec 9;11(12):e00269. doi: 10.14309/ctg.0000000000000269 (PMC7732270; doi:10.14309/ctg.0000000000000269), 2020-12-09
Supplement: ct9-11-e00269-s001.pdf [file ct9-11-e00269-s001.pdf]

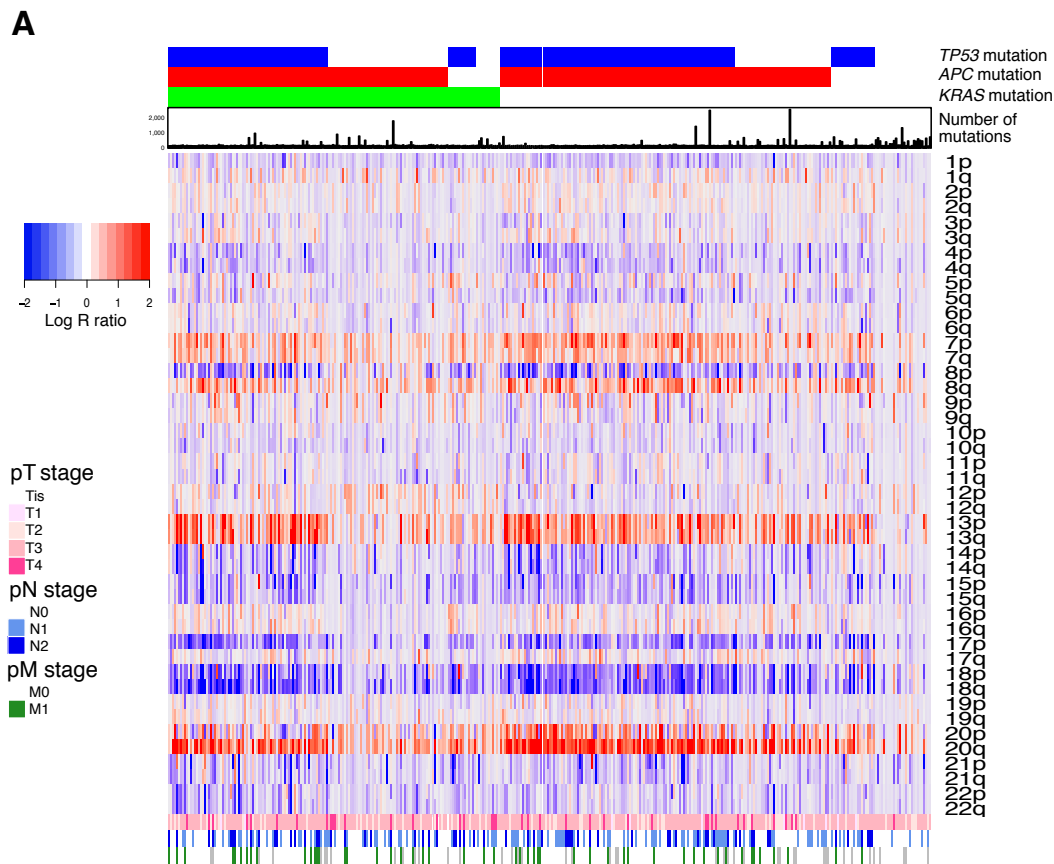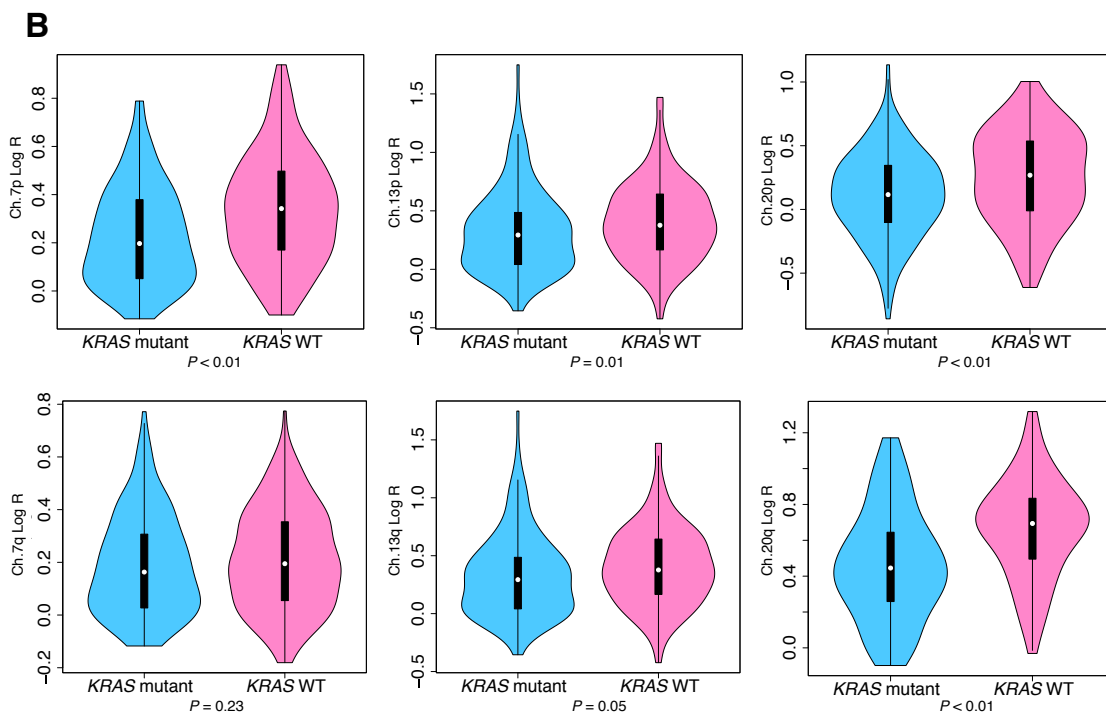

Supplementary Figure 1 Associations of major driver genes of colorectal cancer and copy number

**alterations in The Cancer Genome Atlas (TCGA) dataset**

A) Associations of mutations in *KRAS*, *TP53*, and *APC*, and copy number alterations. B) Comparison of copy number alterations between *KRAS*-mutant and *KRAS*-wild-type cases.

**Supplementary Table 1 Clinicopathological characteristics of pT1 colorectal carcinomas with recurrence or distant metastasis after endoscopic resection**

| No. | Morphological type    | Age (years) | Sex    | Tumour size (mm) | Tumour location | Histological grade | SM depth (µm) | Ly | V | Tumour budding* | Resection  | Months to recurrence | Metastasis site |
|-----|-----------------------|-------------|--------|------------------|-----------------|--------------------|---------------|----|---|-----------------|------------|----------------------|-----------------|
| 1   | Depressed (IIa + IIc) | 38          | Female | 18               | Rb              | Well               | 4,750         | 1  | 1 | 0               | Endoscopic | 7.2                  | Distant LN      |
| 2   | Depressed (IIa + IIc) | 47          | Male   | 23               | Ra              | Mod                | 6,400         | 2  | 1 | 0               | Surgical   | 23.5                 | Lung            |
| 3   | Depressed (IIa + IIc) | 53          | Male   | 15               | Rs              | Por                | 2,200         | 3  | 1 | 2               | Surgical   | 27.4                 | Lung            |
| 4   | Depressed (IIa + IIc) | 65          | Male   | 22               | TC              | Mod/muc            | 3,000         | 1  | 0 | 0               | Surgical   | 0 <sup>†</sup>       | Liver           |
| 5   | Depressed (IIa + IIc) | 84          | Female | 21               | Ra              | Mod/por            | 3,700         | 1  | 0 | 0               | Endoscopic | 16.0                 | Peripheral LN   |
| 6   | Depressed (Is + IIc)  | 56          | Male   | 12               | Rs              | Mod                | 3,250         | 1  | 2 | 2               | Surgical   | 0 <sup>†</sup>       | Liver           |
| 7   | Flat (LST-G)          | 61          | Female | 20               | Rb              | Mod                | 5,000         | 0  | 1 | 2               | Surgical   | 25.1                 | Lung            |
| 8   | Flat (LST-G)          | 70          | Female | 30               | AC              | Mod/por            | 5,200         | 0  | 0 | 0               | Surgical   | 21.7                 | Liver           |
| 9   | Flat (LST-NG)         | 68          | Male   | 23               | Rb              | Por                | 350           | 1  | 0 | 0               | Endoscopic | 54.0                 | Liver           |
| 10  | Protruded (Isp)       | 43          | Male   | 25               | Rs              | Mod/por            | 2,500         | 0  | 0 | 0               | Surgical   | 13.4                 | Lung            |
| 11  | Protruded (Ip)        | 82          | Female | 18               | SC              | Well               | 4,000         | 1  | 0 | 2               | Endoscopic | 37.5                 | Lung            |

\* Counted as numbers of isolated single cells or small clusters (< 5 cells) in the stroma at the invasive tumour margin within a 20x microscopic field, and categorized as grade 1 (< 5 budding foci), grade 2 (5–9), and grade 3 (≥ 10).

<sup>†</sup> In these cases, liver metastases were identified at the time of diagnosis of colorectal carcinoma.

AC, ascending colon; LN, lymph node; LST-G, laterally spreading tumour-granular type; LST-NG, laterally spreading tumour-nongranular type; Ly, lymphatic invasion; Mod, moderately differentiated adenocarcinoma; Muc, mucinous carcinoma; Por, poorly differentiated adenocarcinoma; SC, sigmoid colon; SM, submucosal; TC, transverse colon; V, vascular invasion; Well, well-differentiated adenocarcinoma.

**Supplementary Table 2 Clinicopathological characteristics of pT1 colorectal carcinomas submitted for whole-exome sequencing**

| Characteristic*                   | Morphological type |                     |                    | p value <sup>‡</sup> |
|-----------------------------------|--------------------|---------------------|--------------------|----------------------|
|                                   | Total<br>(n=27)    | Depressed<br>(n=19) | Protruded<br>(n=8) |                      |
| Age, years                        | 69 (62-78)         | 71 (68-80)          | 51 (49-69)         | 0.01                 |
| Sex                               |                    |                     |                    | 0.33                 |
| Female                            | 14 (52%)           | 11 (58%)            | 3 (38%)            |                      |
| Male                              | 13 (48%)           | 8 (42%)             | 5 (62%)            |                      |
| Tumour size, mm                   | 15 (14-20)         | 15 (14-20)          | 21 (15-24)         | 0.06                 |
| Tumour location                   |                    |                     |                    | 0.18                 |
| Proximal colon                    | 14 (52%)           | 12 (63%)            | 2 (25%)            |                      |
| Distal colon                      | 6 (22%)            | 3 (13%)             | 3 (38%)            |                      |
| Rectum                            | 7 (26%)            | 4 (21%)             | 3 (38%)            |                      |
| Histological grade                |                    |                     |                    | 0.08                 |
| Well or moderately differentiated | 23 (85%)           | 15 (79%)            | 8 (100%)           |                      |
| Poorly differentiated or mucinous | 4 (15%)            | 4 (21%)             | 0                  |                      |
| Adenoma component                 |                    |                     |                    | 0.02                 |
| Absent                            | 25 (93%)           | 19 (100%)           | 6 (75%)            |                      |
| Present                           | 2 (7%)             | 0                   | 2 (25%)            |                      |
| SM depth                          |                    |                     |                    | 0.11                 |
| < 1000 $\mu$ m                    | 1 (4%)             | 0                   | 1 (12%)            |                      |
| $\geq$ 1000 $\mu$ m               | 26 (96%)           | 19 (100%)           | 7 (88%)            |                      |
| Lymphatic invasion                |                    |                     |                    | 0.77                 |
| Absent                            | 18 (67%)           | 13 (68%)            | 5 (63%)            |                      |
| Present                           | 9 (33%)            | 6 (32%)             | 3 (37%)            |                      |
| Vascular invasion                 |                    |                     |                    | 0.71                 |

|                             |          |          |         |      |
|-----------------------------|----------|----------|---------|------|
| Absent                      | 12 (44%) | 8 (42%)  | 4 (50%) |      |
| Present                     | 15 (56%) | 11 (58%) | 4 (50%) |      |
| Tumour budding <sup>†</sup> |          |          |         | 0.41 |
| Grade 1                     | 21 (88%) | 14 (74%) | 7 (88%) |      |
| Grade 2-3                   | 6 (12%)  | 5 (26%)  | 1 (12%) |      |

---

\* Data are expressed as number of patients (%) or median (interquartile range).

<sup>†</sup> Counted as numbers of isolated single cells or small clusters (< 5 cells) in the stroma at the invasive tumour margin within a 20x microscopic field, and categorized as grade 1 (< 5 budding foci), grade 2 (5–9), grade 3 ( $\geq 10$ ).

<sup>‡</sup> To compare characteristics between subgroups, we used the Fisher's exact test for categorical variables, and the Wilcoxon rank-sum test for continuous variables.
